# Supplementary material for: Dry Formulation of Virus-Like Particles in Electrospun Nanofibers
Source: MDPI journal article supplement (doi:10.3390/vaccines9030213), 2021-03-03
Supplement: s1 [file s1]

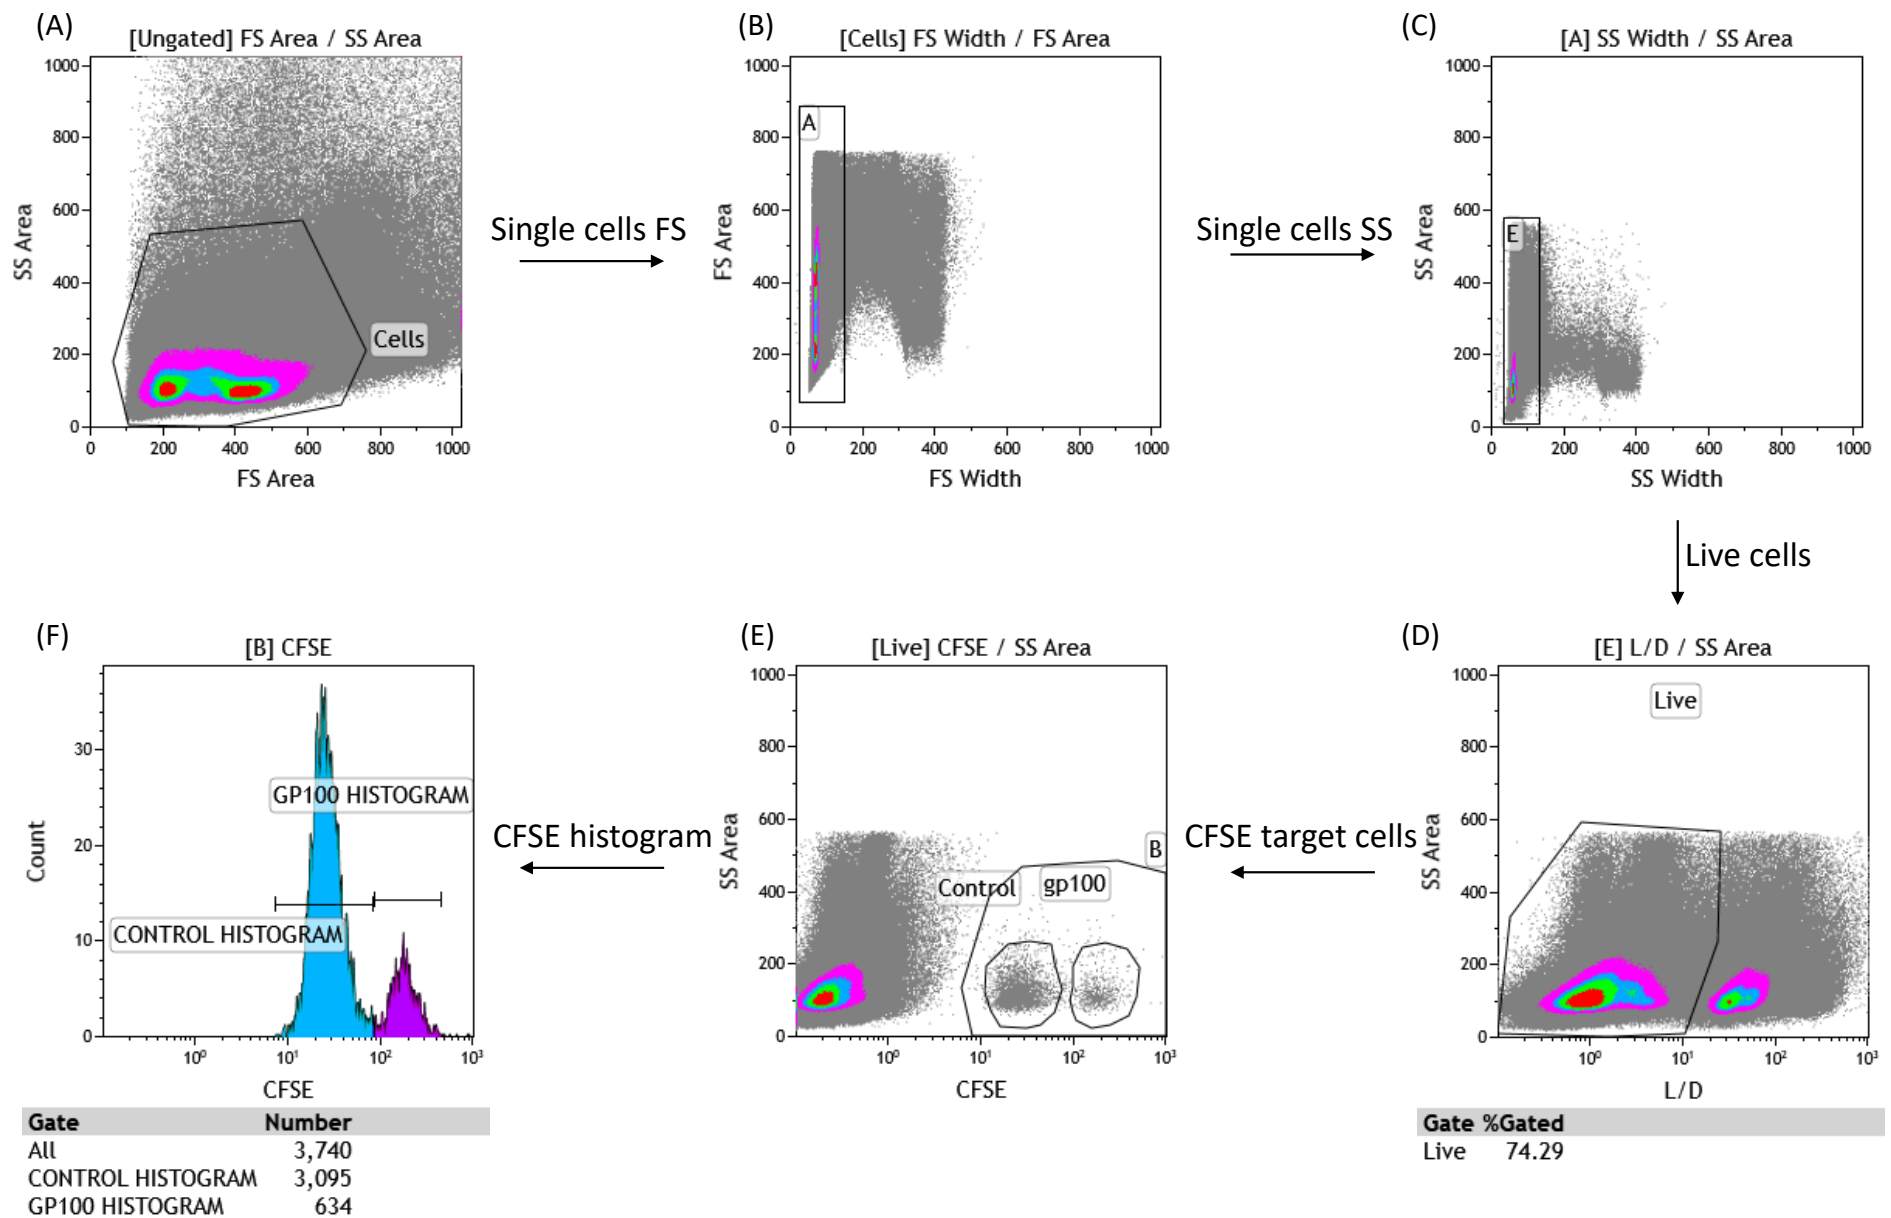

### Supplementary Figure 3: Gating strategy for the *in vivo* cytotoxicity

Total cells were first gated from debris by (A) forward and side-scatter area, followed by the exclusion of doublet cells (B-C) by forward and side-scatter area against forward and side-scatter width. Dead cells were then excluded based on detection of the Near-IR live/dead stain (D). Control cells and gp100-pulsed cells were then separated based on their differential low and high staining with CFSE and counted (E-F).
