# Supplementary material for: Dry Formulation of Virus-Like Particles in Electrospun Nanofibers
Source: MDPI journal article supplement (doi:10.3390/vaccines9030213), 2021-03-03
Supplement: s1 [file s1]

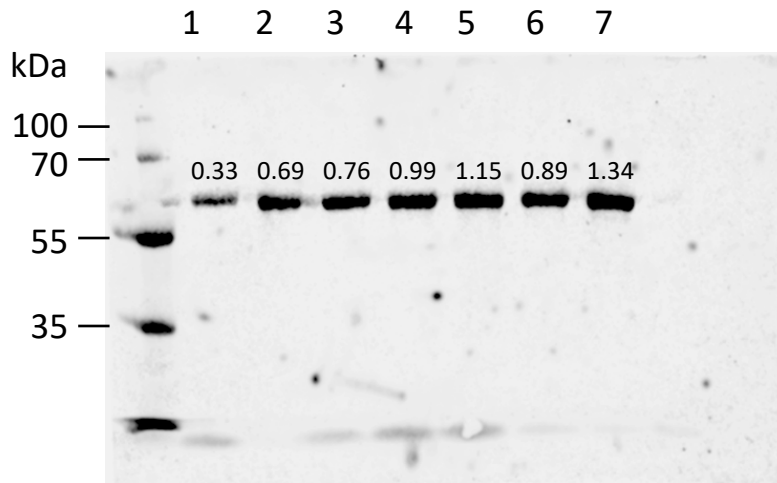

**Supplementary Figure 1.** Nanofibre loading uniformity. Lanes 1-7 represent randomly selected samples cut from the nanofibre mat. Lane 1, 0.05 cm<sup>2</sup> of nanofibre. Lanes 2-7, 0.1 cm<sup>2</sup> of nanofibre per lane. VP60 levels were compared by fluorescent western blot using an anti-RHDV VP60 antibody and near IR fluorescent secondary antibody. Image acquisition and relative band intensities were obtained using a LiCor Odyssey FC instrument and Image Studio software.
